# Supplementary material for: Concurrent antitumor and bone-protective effects of everolimus in osteotropic breast cancer
Source: PubMed Central journal article supplement (PMC5551016; doi:10.1186/s13058-017-0885-7), 2017-08-09

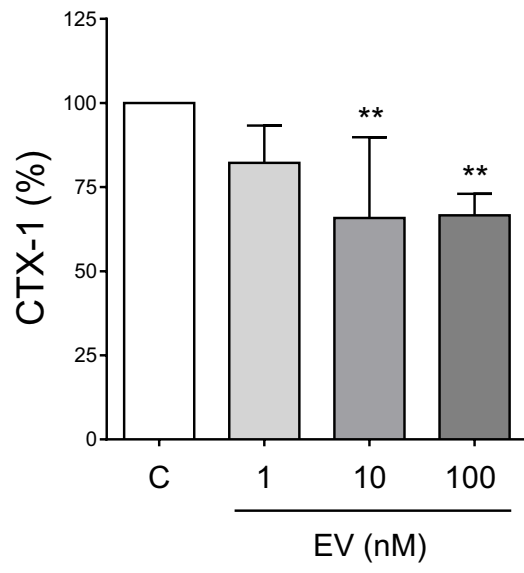

Supplement: 13058_2017_885_MOESM3_ESM.pdf [file 13058_2017_885_MOESM3_ESM.pdf]
