# Supplementary material for: Concurrent antitumor and bone-protective effects of everolimus in osteotropic breast cancer
Source: Springer Nature journal article supplement (doi:10.1186/s13058-017-0885-7), 2017-08-09
Supplement: MOESM4 [file 13942922]

A

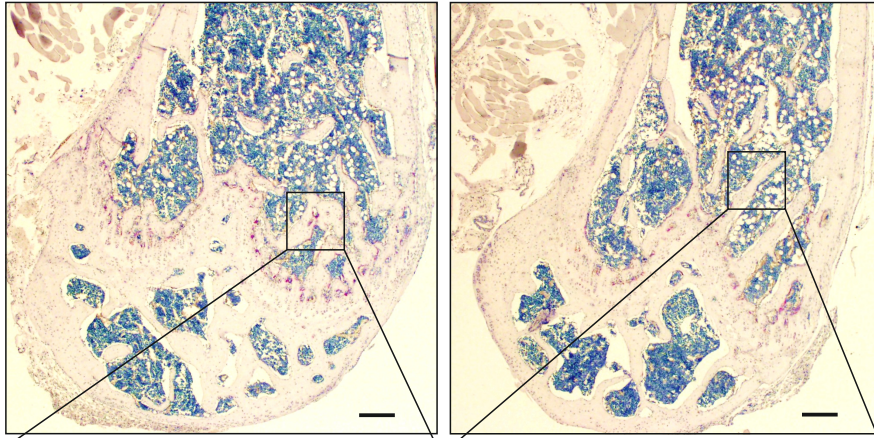

B

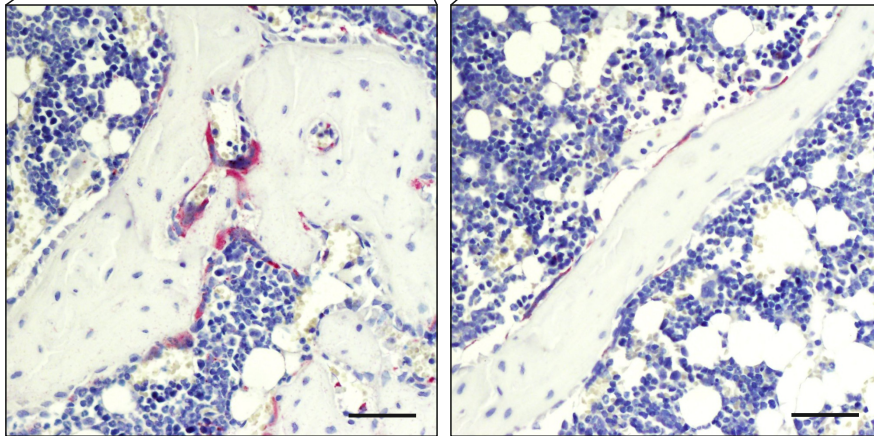

Control OVX

EV OVX
